# Supplementary material for: Critical Transitions in Intensive Care Units: A Sepsis Case Study
Source: PubMed Central journal article supplement (PMC6733794; doi:10.1038/s41598-019-49006-2), 2019-09-09
Supplement: 41598_2019_49006_MOESM1_ESM.pdf [file 41598_2019_49006_MOESM1_ESM.pdf]

# Critical Transitions in Intensive Care Units: A Sepsis Case Study

**Pejman F. Ghalati<sup>1,+</sup>, Satya S. Samal<sup>1,3,+</sup>, Jayesh S. Bhat<sup>1</sup>, Robert Deisz<sup>2</sup>, Gernot Marx<sup>2</sup>, and Andreas Schuppert<sup>1,\*</sup>**

<sup>1</sup>Joint Research Center for Computational Biomedicine, RWTH Aachen University, 52074 Aachen, Germany

<sup>2</sup>Klinik für Operative Intensivmedizin und Intermediate Care, Universitätsklinikum Aachen, 52074 Aachen, Germany

<sup>3</sup>Currently at: BASF SE, Carl-Bosch-Strasse 38, 67056 Ludwigshafen am Rhein, Germany

\*schuppert@combine.rwth-aachen.de

+these authors contributed equally to this work

## **SUPPLEMENTARY INFORMATION**

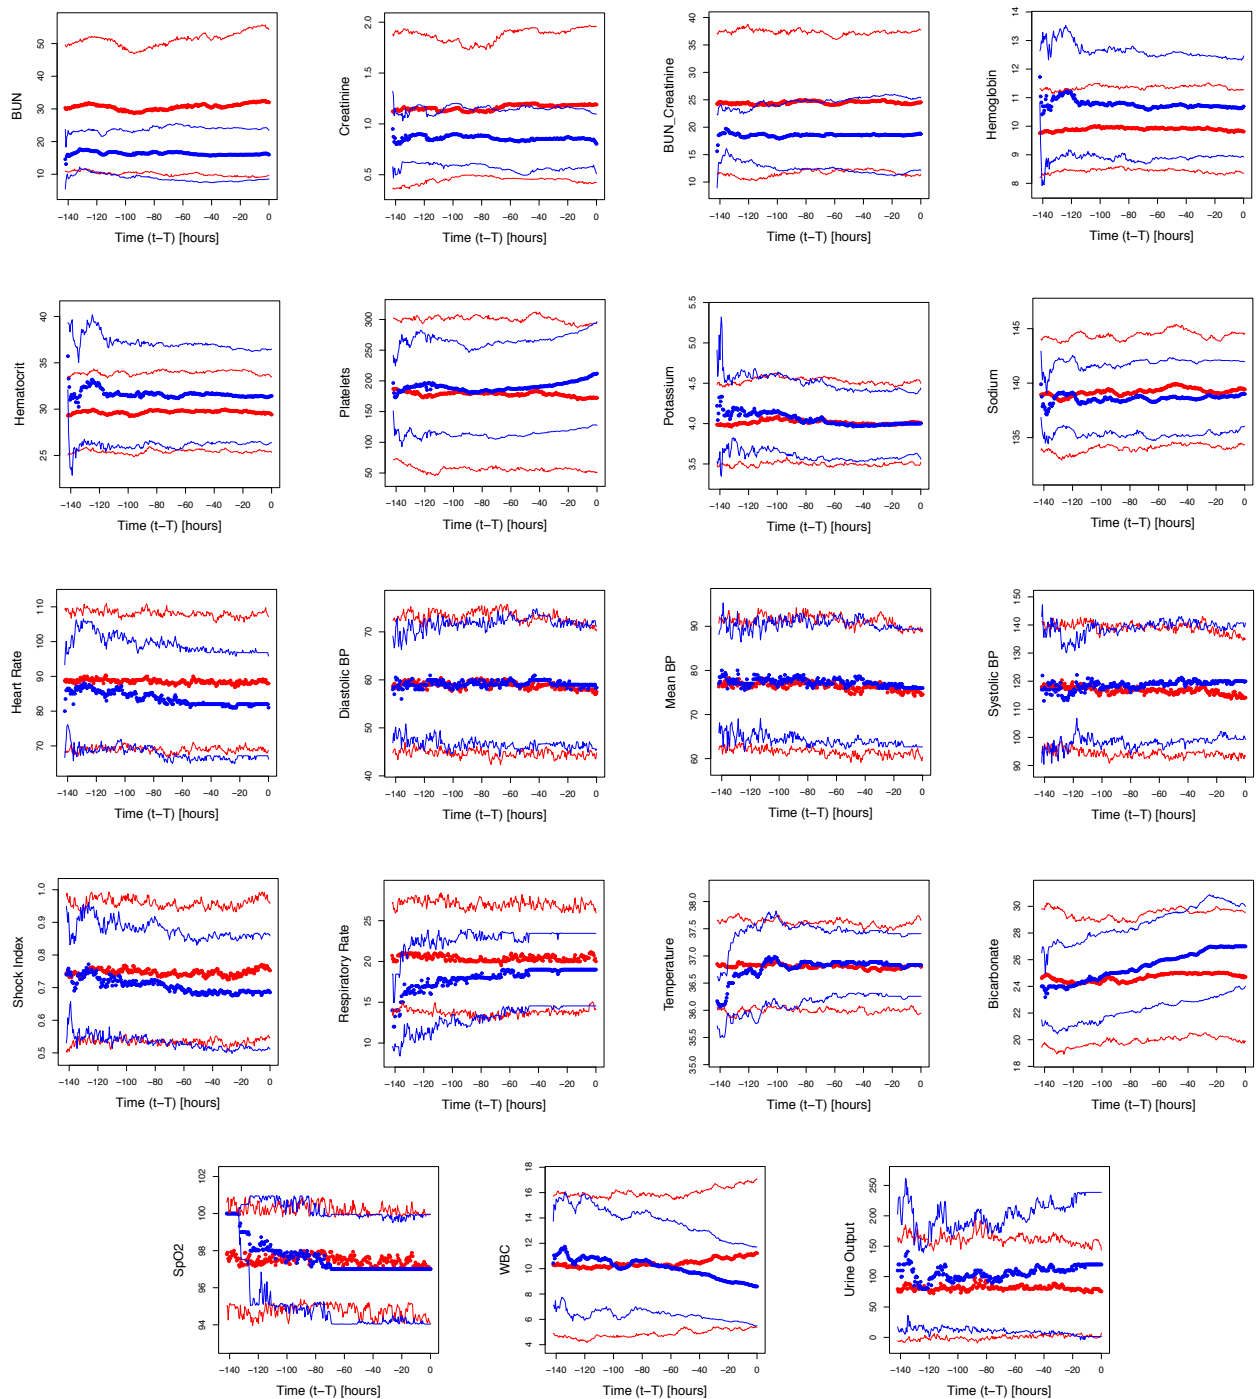

**Figure S1.** Median (dots) and median deviation (lines) of variables in septic shock patients (red) and non-sepsis patients (blue).  $T$  is the length of time series, and  $t - T$  is the time before the onset of septic shock in septic patients or the time before discharge/decease in non-sepsis patients.

|                                                                       | Non-Sepsis (6236)   |                    | Septic Shock (630) |                   |
|-----------------------------------------------------------------------|---------------------|--------------------|--------------------|-------------------|
|                                                                       | Female              | Male               | Female             | Male              |
| Number of patients                                                    | 2700 (43.29 %)      | 3536 (56.70 %)     | 250 (39.68 %)      | 380 (60.31 %)     |
| Age                                                                   | 63.18 ± 18.76 (185) | 60.91 ± 16.03 (86) | 65.56 ± 15.18 (4)  | 64.74 ± 15.38 (4) |
| In-hospital mortality                                                 | 629 (23.30 %)       | 705 (19.94 %)      | 160 (64.00 %)      | 248 (65.26 %)     |
| Infectious and parasitic diseases                                     | 243 (9.00 %)        | 305 (8.63 %)       | 163 (65.20 %)      | 241 (63.42 %)     |
| Neoplasms                                                             | 484 (17.93 %)       | 549 (15.53 %)      | 49 (19.60 %)       | 91 (23.95 %)      |
| Endocrine, nutritional and metabolic diseases, and immunity disorders | 1783 (66.04 %)      | 2283 (64.56 %)     | 189 (75.60 %)      | 290 (76.32 %)     |
| Diseases of the blood and blood-forming organs                        | 815 (30.19 %)       | 758 (21.44 %)      | 151 (60.40 %)      | 210 (55.26 %)     |
| Mental disorders                                                      | 864 (32.00 %)       | 920 (26.02 %)      | 81 (32.40 %)       | 98 (25.79 %)      |
| Diseases of the nervous system                                        | 659 (24.41 %)       | 701 (19.82 %)      | 84 (33.60 %)       | 124 (32.63 %)     |
| Diseases of the sense organs                                          | 223 (8.26 %)        | 181 (5.12 %)       | 24 (9.60 %)        | 23 (6.05 %)       |
| Diseases of the circulatory system                                    | 2139 (79.22 %)      | 2931 (82.89 %)     | 225 (90.00 %)      | 345 (90.79 %)     |
| Diseases of the respiratory system                                    | 1076 (39.85 %)      | 1118 (31.62 %)     | 205 (82.00 %)      | 313 (82.37 %)     |
| Diseases of the digestive system                                      | 885 (32.78 %)       | 1052 (29.75 %)     | 164 (65.60 %)      | 243 (63.95 %)     |
| Diseases of the genitourinary system                                  | 705 (26.11 %)       | 880 (24.89 %)      | 186 (74.40 %)      | 278 (73.16 %)     |
| Complications of pregnancy, childbirth, and the puerperium            | 17 (0.63 %)         | 0 (0.00 %)         | 0 (0.00 %)         | 0 (0.00 %)        |
| Diseases of the skin and subcutaneous tissue                          | 144 (5.33 %)        | 147 (4.16 %)       | 50 (20.00 %)       | 88 (23.16 %)      |
| Diseases of the musculoskeletal system and connective tissue          | 661 (24.48 %)       | 405 (11.45 %)      | 46 (18.40 %)       | 61 (16.05 %)      |
| Congenital anomalies                                                  | 128 (4.74 %)        | 147 (4.16 %)       | 13 (5.20 %)        | 13 (3.42 %)       |
| Certain conditions originating in the perinatal period                | 0 (0.00 %)          | 0 (0.00 %)         | 0 (0.00 %)         | 0 (0.00 %)        |
| Symptoms, signs, and ill-defined conditions                           | 779 (28.85 %)       | 835 (23.61 %)      | 145 (58.00 %)      | 227 (59.74 %)     |
| Injury and poisoning                                                  | 824 (30.52 %)       | 1107 (31.31 %)     | 197 (78.80 %)      | 289 (76.05 %)     |
| External causes of injury and supplemental classification             | 1662 (61.56 %)      | 2114 (59.79 %)     | 170 (68.00 %)      | 269 (70.79 %)     |

**Table S1.** Demographic data of our septic shock and non-sepsis cohorts. According to MIMIC-III documentation, date of birth has been shifted for patients older than 89. The median age for such *very old* patients was 91.4. When calculating mean age of the individual groups, *very old* patients' age (count of such patients indicated in parenthesis) was set to 91.4. The major categories of disease was based on ICD9

| Variable         | $-\log_{10}(P\text{-value})$ |                    | BF   | BF (36 hrs) | BF (18 hrs) |
|------------------|------------------------------|--------------------|------|-------------|-------------|
|                  | $t_{max}$                    | Random Time Points |      |             |             |
| BUN              | 92.2                         | 86.9               | 0.98 | 0.05        | 0.00        |
| BUN-Creatinine   | 44.2                         | 37.8               | 1.00 | 0.99        | 0.99        |
| Creatinine       | 36.0                         | 33.3               | 0.94 | 0.14        | 0.00        |
| Hemoglobin       | 20.2                         | 18.2               | 0.86 | 0.81        | 0.00        |
| Hematocrit       | 15.1                         | 11.6               | 0.99 | 0.99        | 0.51        |
| Shock Index      | 14.4                         | 8.9                | 0.99 | 0.98        | 0.77        |
| Respiratory Rate | 14.3                         | 12.8               | 0.75 | 0.95        | 0.99        |
| Heart Rate       | 12.9                         | 11.6               | 0.75 | 0.72        | 0.50        |
| Systolic BP      | 9.0                          | 2.1                | 1.00 | 0.99        | 0.99        |
| Bicarbonate      | 6.6                          | 9.4                | 0.1  | 0.00        | 0.00        |
| Platelets        | 5.3                          | 5.6                | 0.35 | 0.00        | 0.00        |
| Temperature      | 4.8                          | 1.9                | 0.99 | 0.93        | 0.95        |
| Urine Output     | 4.6                          | 6.0                | 0.2  | 0.00        | 0.00        |
| WBC              | 4.0                          | 3.5                | 0.75 | 0.00        | 0.00        |
| Mean BP          | 2.6                          | 1.1                | 0.97 | 0.83        | 0.52        |
| SpO2             | 1.9                          | 0.9                | 0.91 | 0.00        | 0.00        |
| Diastolic BP     | 1.8                          | 1.0                | 0.85 | 0.32        | 0.06        |
| Sodium           | 1.2                          | 1.3                | 0.42 | 0.00        | 0.00        |
| Potassium        | 0.6                          | 0.2                | 0.82 | 0.92        | 0.98        |
| <b>SLMean</b>    | <b>19.3</b>                  | -                  | -    | -           | -           |

**Table S2.** A statistical significance test (see Sect. 2.4) was performed to test whether the values of clinical variables at largest *SLMean* were able to statistically differentiate septic shock patients from non-sepsis patients.  $-\log_{10}(P\text{-value})$  of each variable at  $t_{max}$  were compared with the median  $-\log_{10}(P\text{-value})$  of randomly selected points. The last three columns show the corresponding *BF (Full)*, *BF (36 hours)* and *BF (18 hours)* of each variable.

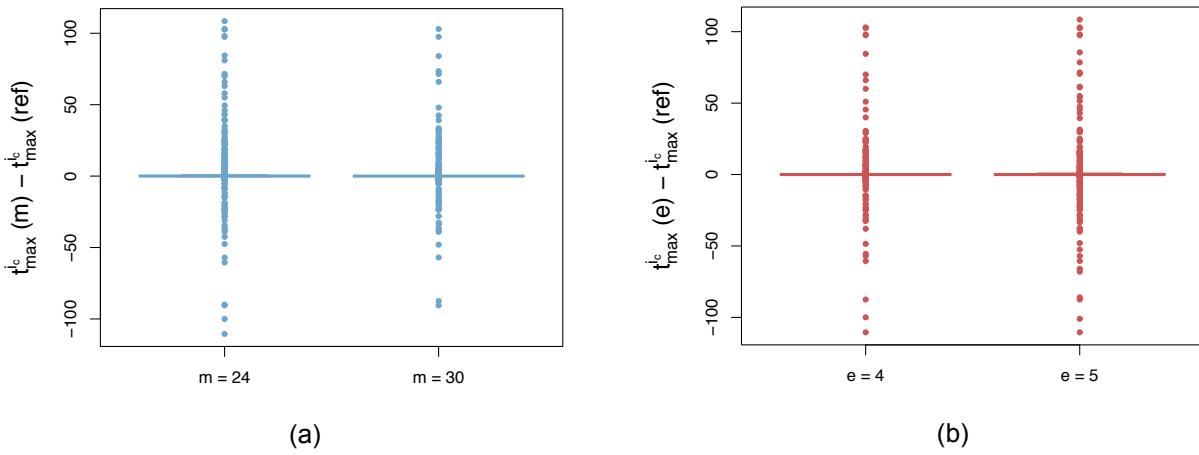

**Figure S2.** The robustness of our procedure was examined by calculating SL of septic patients ( $c = 1$  in Sect. ??) using different settings of moving time-window ( $m \in (24, 30)$  and  $e \in (4, 5)$ ). The corresponding  $t_{max}^ic$  for each set of parameters, along with their difference from the reference parameter set ( $m = 36, e = 3$ ), were obtained. a) The difference between  $t_{max}(m)$  and  $t_{max}^ic(ref)$  shows the effect of moving time-window length on  $t_{max}^ic$ . b) The difference between  $t_{max}^ic(e)$  and  $t_{max}^ic(ref)$  shows the effect of number of trends on  $t_{max}^ic$ .
